# Supplementary material
Source: MDPI journal article supplement (https://www.mdpi.com/1424-8247/15/8/1004)
Supplement: s1 [file s1]

Supporting Materials

# Study of orally disintegrating tablets using erythritol as an excipient produced by moisture-activated dry granulation (MADG)

Mizuki Yamada<sup>1,†</sup>, Agata Ishikawa<sup>1,†</sup>, Shun Muramatsu<sup>1</sup>, Takayuki Furuishi<sup>1,\*</sup>, Yoshinori Onuki<sup>2</sup>, Kaori Fukuzawa<sup>1,3</sup>, Etsuo Yonemochi<sup>1,\*</sup>

<sup>1</sup> Department of Physical Chemistry, School of Pharmacy and Pharmaceutical Sciences, Hoshi University, 2-4-41 Ebara, Shinagawa-ku, 142-8501 Tokyo, Japan

<sup>2</sup> Laboratory of Pharmaceutical Technology, School of Pharmacy and Pharmaceutical Sciences, University of Toyama, 2630 Sugitani, Toyama-shi, Toyama, 930-0194, Japan

<sup>3</sup> Graduate School of Pharmaceutical Sciences, Osaka University; 1-6 Yamadaoka, Suita, 565-0871, Osaka Japan

\* Correspondence: t-furuishi@hoshi.ac.jp (T.F.), e-yonemochi@hoshi.ac.jp (E.Y.)

† These authors contributed equally to this work.

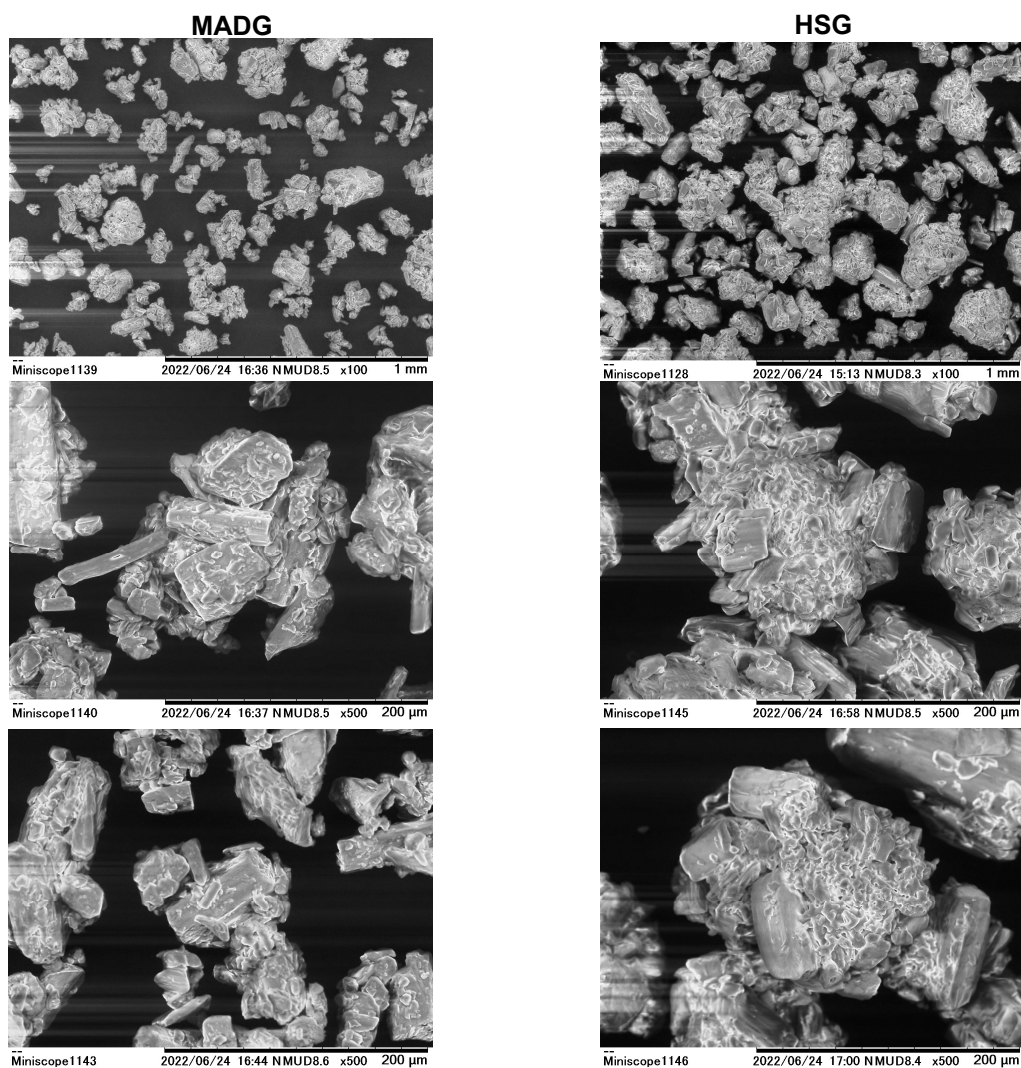

**Figure S1.** SEM photographs of the granules by MADG and HSG

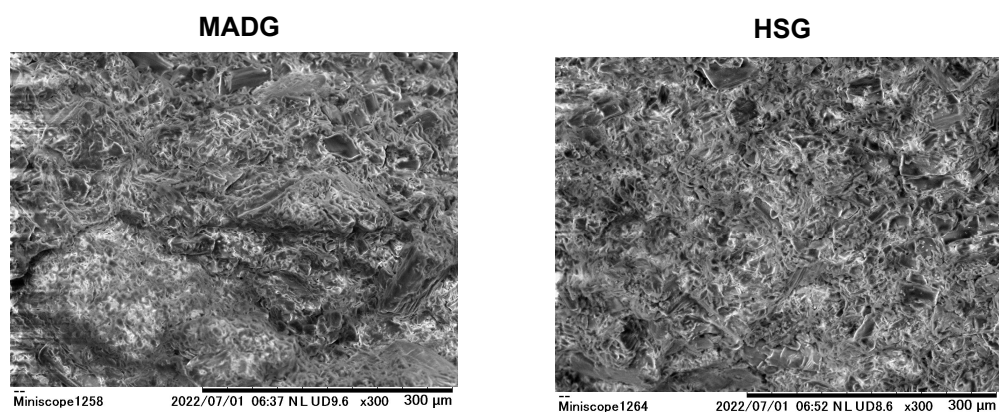

**Figure S2.** SEM photographs of the inner structure of the tablets by MADG and HSG

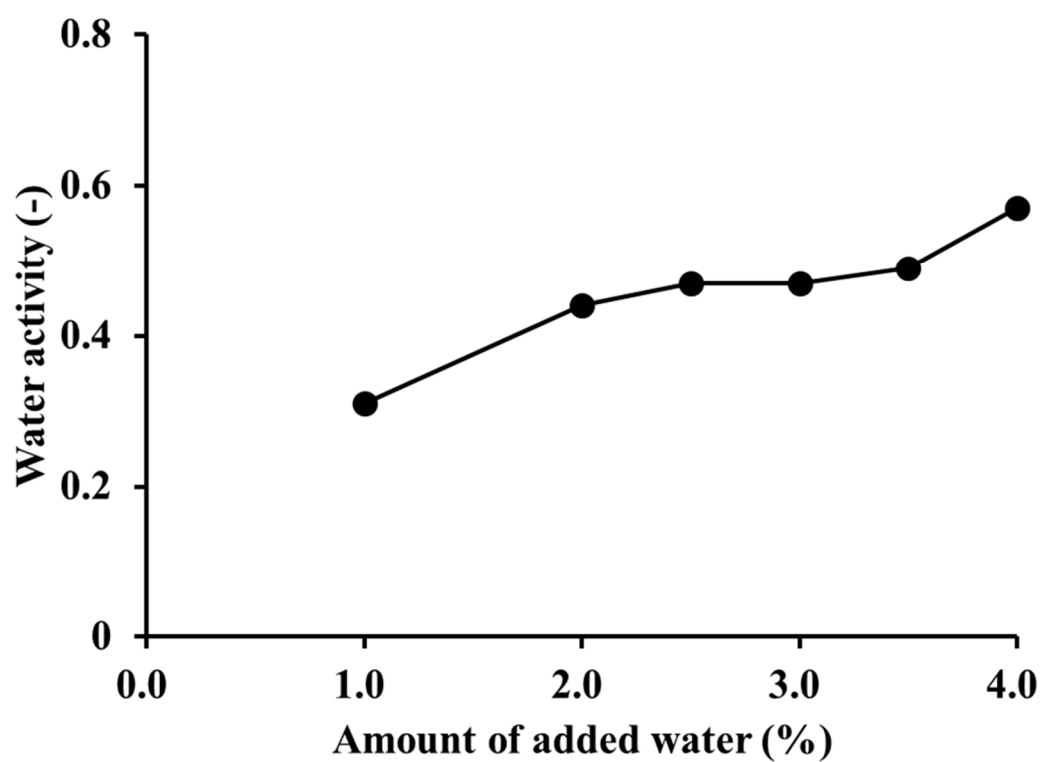

**Figure S3.** Effect of the volume of water on the water activity of granules

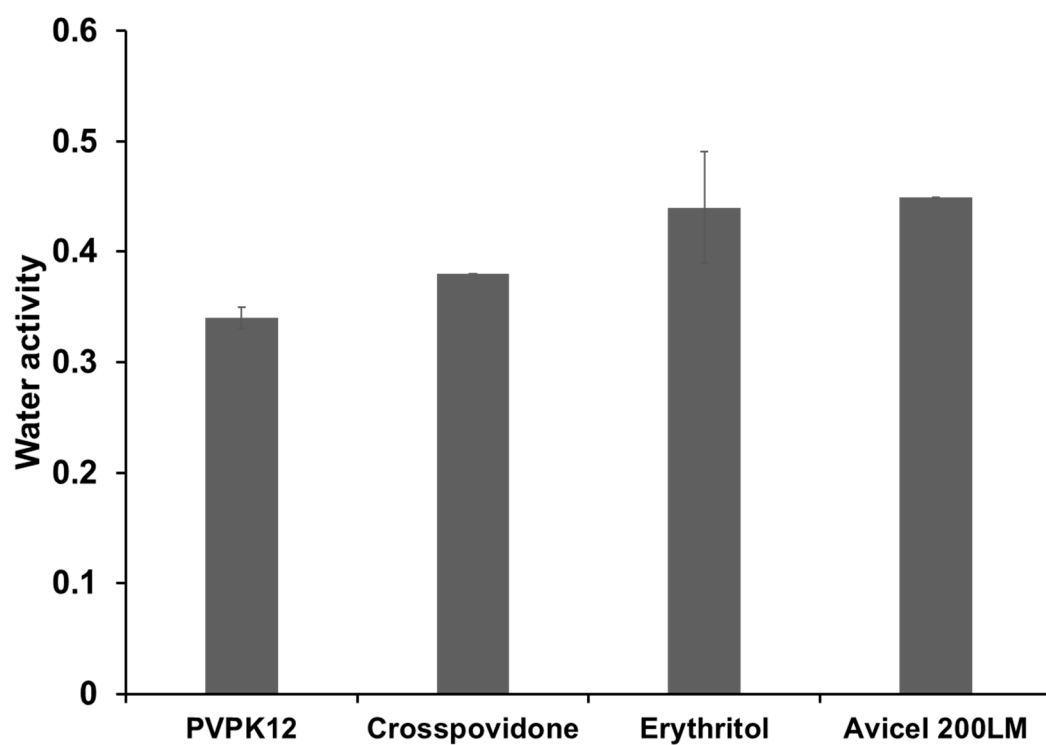

**Figure S4.** Water activity of excipients. The bar indicates average  $\pm$  S.D.,  $n = 3$

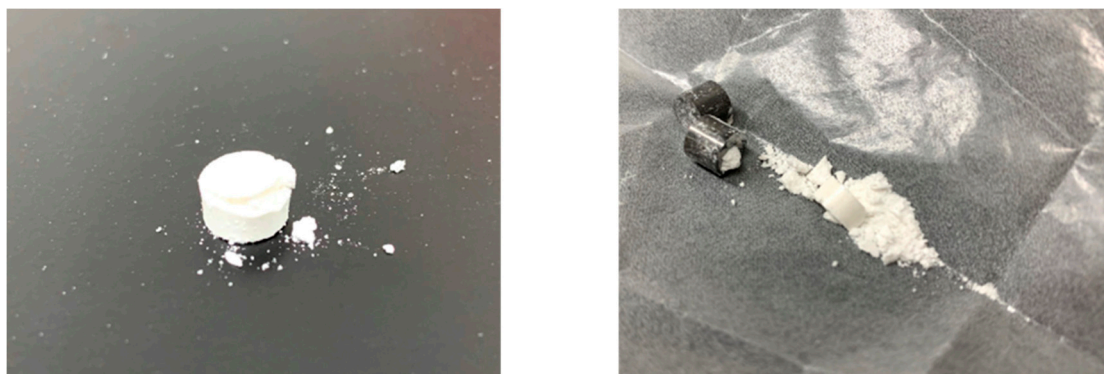

**Figure S5.** Photographs of the tablets produced using MADG with 1% added water (left) and at 5% added water (right).

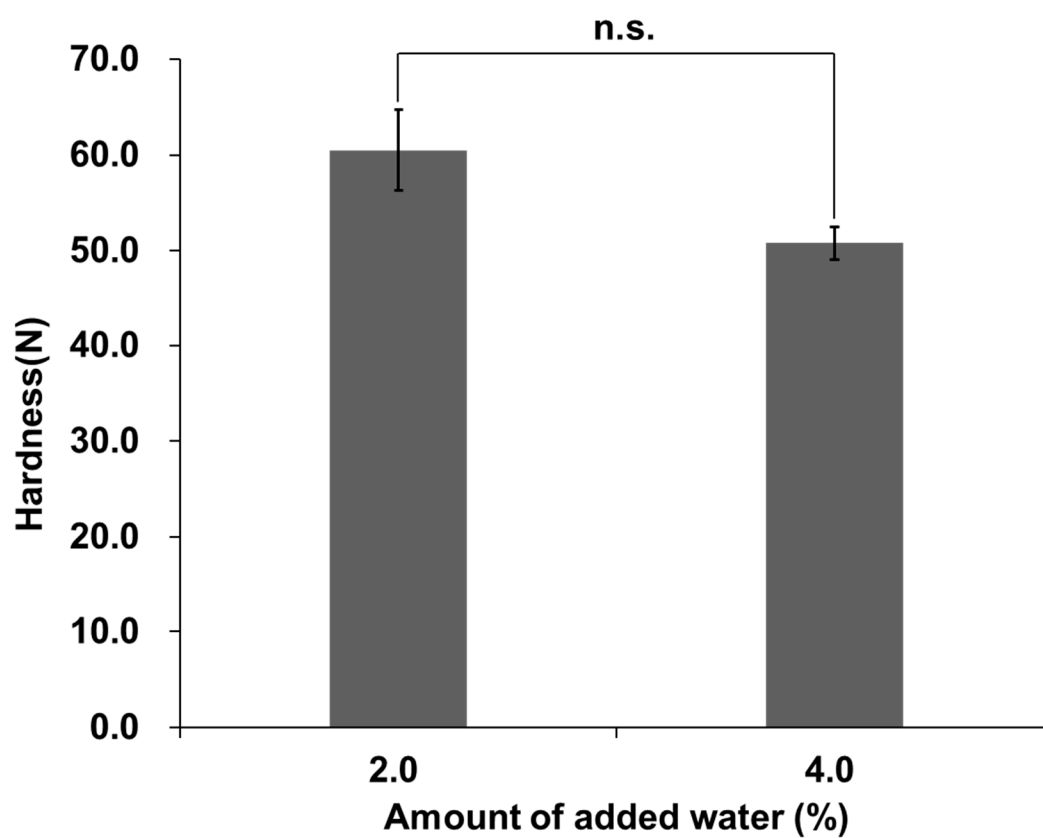

**Figure S6.** Differences in tablet hardness between 2% and 4% added water The bar indicates average  $\pm$  S.D.,  $n = 3$

**Table S1.** Analysis of valiance (ANOVA) table for (a) compression pressure, (b) detachment stress, (c) ejection stress, (d) tensile strength, and (e) tablet density

**(a)**

|                    | DF <sup>a</sup> | MS <sup>b</sup> | F <sub>o</sub> <sup>c</sup> | P value |
|--------------------|-----------------|-----------------|-----------------------------|---------|
| X1: Sample         | 1               | 0.1             | 4.0                         | 0.0561  |
| X2: Loading weight | 2               | 59684.2         | 1002161.5                   | < 0.01  |
| Error              | 26              | 0.8             |                             |         |
| Total              | 29              | 59685.1         |                             |         |

<sup>a</sup> Degree of freedom, <sup>b</sup> Mean square, <sup>c</sup> Observed *F* value

**(b)**

|                    | DF <sup>a</sup> | MS <sup>b</sup> | F <sub>o</sub> <sup>c</sup> | P value |
|--------------------|-----------------|-----------------|-----------------------------|---------|
| X1: Sample         | 1               | 7.4             | 121.7                       | < 0.01  |
| X2: Loading weight | 2               | 59.2            | 484.5                       | < 0.01  |
| Error              | 26              | 1.6             |                             |         |
| Total              | 29              | 68.3            |                             |         |

<sup>a</sup> Degree of freedom, <sup>b</sup> Mean square, <sup>c</sup> Observed *F* value

**(c)**

|                    | DF <sup>a</sup> | MS <sup>b</sup> | F <sub>o</sub> <sup>c</sup> | P value |
|--------------------|-----------------|-----------------|-----------------------------|---------|
| X1: Sample         | 1               | 4.6             | 53.1                        | < 0.01  |
| X2: Loading weight | 2               | 13.7            | 78.8                        | < 0.01  |
| Error              | 26              | 2.3             |                             |         |
| Total              | 29              | 20.6            |                             |         |

<sup>a</sup> Degree of freedom, <sup>b</sup> Mean square, <sup>c</sup> Observed *F* value

**(d)**

|                    | DF <sup>a</sup> | MS <sup>b</sup> | F <sub>o</sub> <sup>c</sup> | P value |
|--------------------|-----------------|-----------------|-----------------------------|---------|
| X1: Sample         | 1               | 0.65            | 26.9                        | < 0.01  |
| X2: Loading weight | 2               | 12.16           | 251.7                       | < 0.01  |
| Error              | 26              | 0.63            |                             |         |
| Total              | 29              | 13.44           |                             |         |

<sup>a</sup> Degree of freedom, <sup>b</sup> Mean square, <sup>c</sup> Observed *F* value

**(e)**

|                    | DF <sup>a</sup> | MS <sup>b</sup> | F <sub>o</sub> <sup>c</sup> | P value |
|--------------------|-----------------|-----------------|-----------------------------|---------|
| X1: Sample         | 1               | 0.004           | 7.0                         | < 0.05  |
| X2: Loading weight | 2               | 0.077           | 63.5                        | < 0.01  |
| Error              | 26              | 0.016           |                             |         |
| Total              | 29              | 0.097           |                             |         |

<sup>a</sup> Degree of freedom, <sup>b</sup> Mean square, <sup>c</sup> Observed *F* value

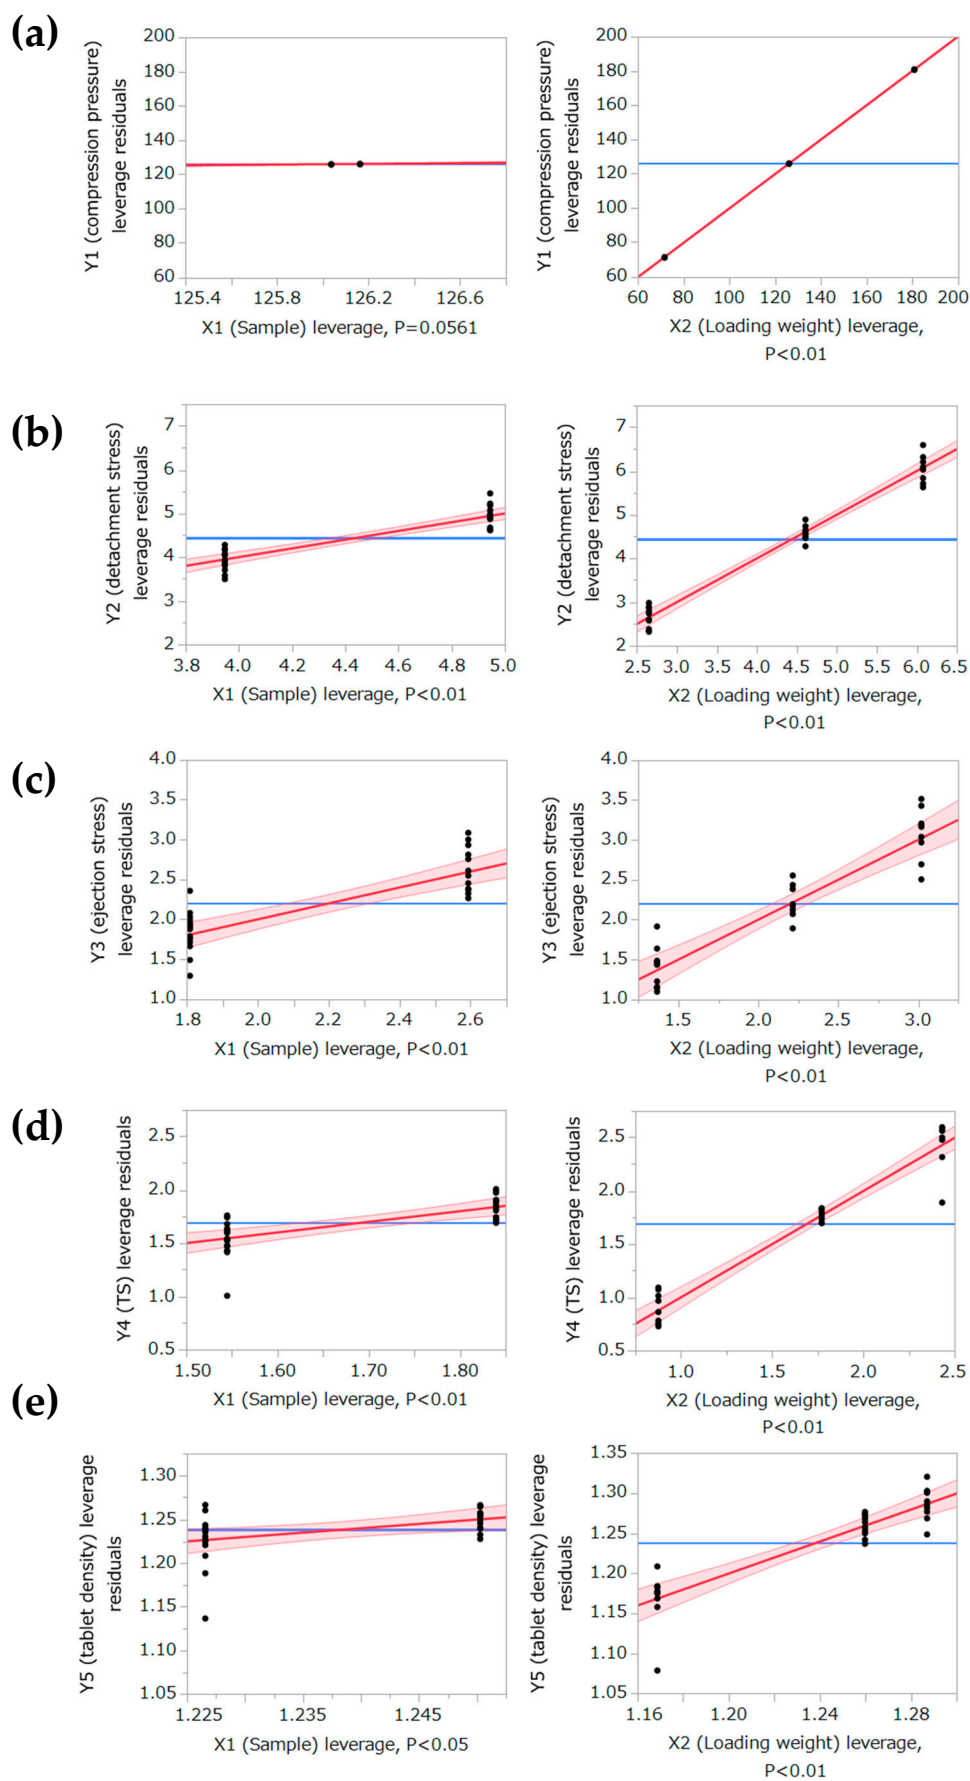

**Figure S7.** Effect leverage plots for (a) compression pressure, (b) detachment stress, (c) ejection stress, (d) tensile strength, and (e) tablet density
